16 **ORIGINALITY - SIGNIFICANCE STATEMENT**

17 Bacterial metabolites are key molecular intermediates between the gut microbiota and host cells. Our  
18 study in piglets reveals that the metabolic activity of the gut microbiota shifts at weaning, a key  
19 developmental period for intestinal and immune health. We also show that this functional maturation  
20 of the gut microbiota is strongly influenced by maternal environment. Thus, targeting early life  
21 environmental factors is a promising strategy to program health through the production of beneficial  
22 bacterial metabolites at the suckling-to-weaning transition.

23 **SUMMARY**

24 The objective of this study was to analyze in piglets the impact of weaning on the production of  
25 metabolites by gut bacteria and to determine whether early life environment influences the functional  
26 maturation of the gut microbiota. Fecal metabolome and microbiome were analyzed in piglets raised  
27 in two separate maternity farms and mixed at weaning. In piglets from both maternity farms, the  
28 relative abundance of *Lactobacillus* and of the predicted function “Fucose degradation” decreased  
29 after weaning while the relative abundance of *Ruminococcus 2* and of the predicted function “Starch  
30 degradation” increased. In piglets from the first maternity farm, the relative concentration of biogenic  
31 amines and the relative abundance of *Escherichi-Shigella* decreased after weaning while the relative  
32 concentration of short chain fatty acids and the relative abundance of *Christensenellaceae R-7 group*  
33 and *Ruminococcaceae UCG-002* increased. These changes were not observed at weaning in piglets  
34 from the second maternity farm probably because they already had high relative concentration of short  
35 chain fatty acids and higher relative abundance of *Christensenellaceae R-7 group* and  
36 *Ruminococcaceae UCG-002* during the suckling period. In conclusion, the functional maturation of  
37 the microbiota at weaning is highly dependent on the maternal environment in piglets.

38

39 **KEY WORDS**

40 Early life, Milk, Solid food, Metabolites

## 41 INTRODUCTION

42 The gut microbiota is a major regulator of animal physiology and health. After initial colonization at  
43 birth by microorganisms originating both from the mother and the environment, maternal milk shapes  
44 the gut microbiota composition through nutrients (e.g. lactose, milk oligosaccharides),  
45 immunoglobulins and antimicrobial compounds (e.g. lactoferrin, lysozyme) (Macpherson *et al.*, 2017).  
46 Later in life, solid food ingestion induces the maturation of the gut microbiota mainly through a  
47 modification of dietary substrates available for bacteria (Voreades *et al.*, 2014). These microbial  
48 modifications at the suckling-to-weaning transition are involved in the postnatal maturation of the gut  
49 barrier and immune system (Hooper, 2004; Jain and Walker, 2015). Moreover, it was recently shown  
50 that these alterations of the gut microbiota at the onset of solid food ingestion induce a transient  
51 intestinal immune response called the “weaning-reaction” that programs long term susceptibility of the  
52 host to inflammatory and metabolic dysfunctions (Al Nabhani, Dulauroy, Lécuyer, *et al.*, 2019; Al  
53 Nabhani, Dulauroy, Marques, *et al.*, 2019). Although the underlying mechanisms are not fully  
54 identified yet, emerging evidences suggest that bacterial metabolites may play a key role as  
55 intermediates between the microbiota and its host at the suckling-to-weaning transition (Al Nabhani  
56 and Eberl, 2020). Therefore, identifying the metabolites produced by gut bacteria in young mammals  
57 across this dietary shift might be useful for the development of health-promoting strategies based on  
58 the control of the metabolic activity of the microbiota in early life.

59 Piglets raised in commercial conditions represent an attractive animal model to study the effects of  
60 weaning on the microbiota since the separation from the sow occurs 3 to 4 weeks after birth (versus 8  
61 to 14 weeks in natural conditions) which results in an abrupt cessation of suckling when piglets milk  
62 intake is still high while solid feed intake very low (Newberry and Wood-Gush, 1985). Moreover, the  
63 results obtained in this model are relevant both for the pig industry (e.g. management of post-weaning  
64 diarrhea in piglets) and for human health due to the anatomical, functional and microbial similarities  
65 between piglet and human infant gastrointestinal tract (Heinritz *et al.*, 2013; Gresse *et al.*, 2017).  
66 Numerous studies in piglets described a major shift in the microbiota taxonomic composition and  
67 functional capacity at the suckling-to-weaning transition (Frese *et al.*, 2015; Mach *et al.*, 2015; Slifierz  
68 *et al.*, 2015; Bian *et al.*, 2016; Chen *et al.*, 2017; De Rodas *et al.*, 2018; Guevarra *et al.*, 2018; Li *et al.*,

69 2018; Lu *et al.*, 2018; W. Wang *et al.*, 2019; X. Wang *et al.*, 2019). Although to a much lower extent,  
70 maternal environment (e.g. nursing mother) was also shown to impact the microbiota composition in  
71 piglets around weaning (Bian *et al.*, 2016). However, these studies were limited to DNA sequencing-  
72 based approaches and did not investigate the influence of early life environment and weaning on the  
73 actual production of metabolites by gut bacteria.

74 Herein, we analyzed the metabolic activity of the gut microbiota during the suckling period and after  
75 weaning in piglets raised in two distinct maternal environments and mixed at weaning in the same  
76 room. By using a combination of H<sup>1</sup>-nuclear magnetic resonance (NMR) based metabolomics, 16S  
77 rRNA gene sequencing and bacterial pathway inference, our study reveals that the functional  
78 maturation of the gut microbiota at weaning is strongly influenced by the maternal environment in  
79 piglets.

80

## 81 **RESULTS**

### 82 **Maternal environment and weaning influence piglet fecal metabolome**

83 We studied piglets raised in two separate maternity farms and mixed at weaning (day 21) in the same  
84 pens in one room (figure 1). Metabolome was analyzed by  $H^1$ -NMR metabolomics in fecal samples  
85 collected from piglets during the suckling period (day 13) and two days after weaning (day 23). We  
86 identified thirty-nine metabolites in the NMR spectra of piglet fecal samples (table 1 and figure 2).  
87 During the suckling period (day 13), partial least-square discriminant analysis (PLS-DA) suggested  
88 differences of metabolome between piglets from the two maternity farms (figure 3A). Indeed,  
89 succinate and 3-(4-hydroxyphenyl)propionate relative concentrations were significantly higher in  
90 piglets from maternity 1 compared to piglet from maternity 2, while the opposite was observed for  
91 isobutyrate and propionate (figure 3B, table S2). In piglets from maternity 1, we observed a strong  
92 modification of fecal metabolome after weaning (figure 3A). Indeed, the relative concentration of  
93 cadaverine, tyramine, succinate, 3-(4-hydroxyphenyl)propionate, 5-aminovalerate and choline  
94 decreased after weaning in piglets from maternity 1, while the relative concentrations of acetate,  
95 propionate, dihydroxyacetone, glycerol, glutamate and uracil increased (figure 3B, table S2). In  
96 contrast, in piglets from maternity 2, the metabolic shift observed at weaning was less pronounced  
97 according to the PLS-DA analysis (figure 3A). Accordingly, we found no significant effect of weaning  
98 on the relative concentrations of individual metabolites in piglets from maternity 2 (figure 3B, table  
99 S2). At day 23, the relative concentration of only one metabolite (glycerol) was significantly different  
100 between the piglets from the two maternity farms (figure 3B, table S2). Altogether, our results show  
101 that the metabolic alteration observed in feces at weaning is influenced by the maternal environment in  
102 piglets. Since most of the metabolites which concentration was altered at weaning are known to be  
103 produced by bacteria (e.g. biogenic amines, short chain fatty acids (SCFA), succinate, 3-(4-  
104 hydroxyphenyl)propionate), our data indicated that the metabolic activity of the gut microbiota shifted  
105 at weaning in an early-life environment dependent manner.

106

### 107 **Maternal environment and weaning influence piglet fecal microbiota diversity and composition**

108 We explored whether the functional maturation of the gut microbiota at weaning was linked to a  
109 modification of its taxonomic composition by using 16S rRNA amplicon sequencing in the same fecal  
110 samples than those used for metabolomics analysis. At day 13, there was no significant difference  
111 between the  $\alpha$ -diversity of the microbiota of piglets from the two maternity farms (figure 4A, table  
112 S3). In piglets from maternity 1, the three diversity indices tested (OTU richness, Shannon and Inverse  
113 Simpson) increased significantly after weaning. In contrast, in piglets from maternity 2, there was only  
114 a significant increase of OTU richness after weaning, while the two other diversity indices remained  
115 unchanged. At day 23 (i.e. after weaning), there was no significant differences in  $\alpha$ -diversity between  
116 the piglets from the two maternity farms.  $\beta$ -diversity analysis at OTU level using the Bray-Curtis  
117 distance revealed a strong effect of both maternal environment and of weaning on the microbiota  
118 structure (figure 4B).

119 The relative abundances of bacterial groups are presented at phylum (table S4), family (figure 5A and  
120 table S5), genus (figure 5B for the top 10 most abundant groups and table S6) and OTU level (table  
121 S7). At day 13, the relative abundances of Clostridiales vadinBB60 group, Christensenellaceae,  
122 *Christensenellaceae R-7 group* and *Ruminococcaceae UCG-002* were higher in piglets from maternity  
123 2 compared to piglets from maternity 1. After weaning, in piglets from both maternities, there was an  
124 increase in the relative abundance of Ruminococcaceae and *Ruminococcus 2* and a decrease in the  
125 relative abundance of Lactobacillaceae and *Lactobacillus*. In addition, some effects of weaning were  
126 observed only in piglets from one of the two maternity farms studied. In piglets from maternity 1,  
127 there was a reduction of the relative abundance of Proteobacteria, Enterobacteriaceae and *Escherichia-*  
128 *Shigella* after weaning while the relative abundances of Christensenellaceae, *Christensenellaceae R-7*  
129 *group* and *Ruminococcaceae UCG-002* increased. In piglets from maternity 2, the relative abundance  
130 of Peptostreptococcaceae increased after weaning. After weaning (at day 23), the relative abundances  
131 of Spirochaetes and *Ruminococcaceae UCG-002* were higher in piglets from maternity 2 when  
132 compared to piglets from maternity 1 while the opposite was observed for Atopobiaceae. Altogether,  
133 these results show that both maternal environment and weaning shape the microbiota composition in  
134 piglets.

135

136 **Maternal environment and weaning influence the predicted functionality of the gut microbiota**

137 We predicted the functional capacity of gut bacteria by using inference based on 16S rDNA amplicons  
138 sequences (PICRUSt2). Heatmap representation of the relative abundance of all predicted pathways  
139 suggested that the functional potential of the microbiota was influenced mainly by age and to a lower  
140 extent by maternal environment (figure 6A). Indeed, there was a significant effect of weaning for 62%  
141 of the predicted pathways (199/320) and a significant effect of maternal environment for only 5% of  
142 them (15/320) (table S8). We focused on two key microbial pathways involved in the degradation of  
143 dietary substrates available for the gut microbiota: fucose (a monosaccharide contained in milk  
144 oligosaccharides) and starch (a major plant carbohydrate).

145 The relative abundance of the predicted pathway “Fucose degradation” decreased after weaning in  
146 piglets from both maternity farms (figure 6B). The 5 OTUs contributing the most to this predicted  
147 function were affiliated to Enterobacteriaceae, Lachnospiraceae and Ruminococcaceae (figure 6B and  
148 table S9). At day 13, the relative contribution of OTU8 (Ruminococcaceae) to this function was more  
149 important in piglets from maternity 2 than in piglets from maternity 1. In piglets from maternity 1, the  
150 relative contribution of OTU1 (Enterobacteriaceae) to the fucose degradation pathway decreased after  
151 weaning while the opposite was observed for the OTU33 (Lachnospiraceae). In piglets from maternity  
152 2, the relative contribution of the 5 OTUs contributing the most to this pathway did not change after  
153 weaning. At day 23, the relative contribution of OTU8 (Ruminococcaceae) was still more important in  
154 piglets from maternity 2 compared to piglets from maternity 1 while the opposite was observed for the  
155 relative contribution of OTU19 (Lachnospiraceae).

156 The relative abundance of the predicted pathway “Starch degradation V” increased after weaning in  
157 piglets from both maternity farms (figure 6C). The 5 OTUs contributing the most to this function were  
158 affiliated to Ruminococcaceae, Lachnospiraceae and Clostridiaceae 1 (figure 6C and table S10). At  
159 day 13, the relative contribution of OTU8 (Ruminococcaceae) to this function was more important in  
160 piglets from maternity 2 compared to piglets from maternity 1. The relative contribution of OTU3  
161 (Ruminococcaceae) increased after weaning in piglets from both maternity farms. At day 23, the  
162 relative contribution of OTU8 (Ruminococcaceae) to this function was still more important in piglets  
163 from maternity 2 compared to piglets from maternity 1 (as observed at day 13).



164 It is important to consider that the relative contribution of OTUs to these two predicted pathways was  
165 strongly and positively correlated with the OTUs relative abundances (table S7,  $\rho > 0.86$  for both  
166 pathways). Moreover, all the OTUs contributing the most to the predicted pathways had a high relative  
167 abundance ( $> 1.4\%$  in at least one group, table S7). Overall, our results show that weaning and, to a  
168 lower extent, maternal environment influence the predicted functionality of the gut microbiota and the  
169 relative contributions of bacterial OTUs to these functions.

## 170 **DISCUSSION**

171 Our study reveals that the production of metabolites by gut bacteria shifts at weaning in piglets in an  
172 early life environment-dependent manner. Since bacterial metabolites which concentration was altered  
173 at weaning (e.g. SCFA and biogenic amines) are known to regulate the homeostasis of host cells (Koh  
174 *et al.*, 2016; Tofalo *et al.*, 2019), the metabolic shift of the microbiota observed at weaning might have  
175 major implication for health. Moreover, the influence of maternal environment on the functional  
176 maturation of the microbiota at weaning in piglets suggests that controlling early life environment  
177 might be a promising strategy to promote the production of beneficial metabolites at weaning, and thus  
178 to program long term health (Al Nabhani and Eberl, 2020).

179 During the suckling period, the microbiota of piglets raised in the two separate maternity farms  
180 produced different levels of several bacterial metabolites. For instance, the relative concentration of 3-  
181 (4-hydroxyphenyl)propionate was higher in piglets from maternity 1 during the suckling period. This  
182 metabolite is produced by the microbiota through degradation of the aromatic amino acid tyrosine  
183 (Oliphant and Allen-Vercoe, 2019) which concentration was similar in the feces of piglets from both  
184 maternities. Thus, rather than substrate availability, differences in microbiota composition and  
185 functional potential might drive the differential production of 3-(4-hydroxyphenyl)propionate. We also  
186 observed a high concentration of succinate in fecal samples of piglets from maternity 1, despite this  
187 metabolic intermediate usually do not accumulate since it can be rapidly converted to SCFA by gut  
188 bacteria (Oliphant and Allen-Vercoe, 2019). Accordingly, the concentration of the SCFAs propionate  
189 and isobutyrate were lower in piglets from maternity 1 than in piglets from maternity 2. Since  
190 propionate is produced mainly through plant derived polysaccharide degradation (Louis and Flint,  
191 2017), our results suggest that carbohydrate fermentation might be more active in suckling piglets  
192 from maternity 2. The different metabolic activity of the microbiota of piglets from the two maternity  
193 farms might be explained by their different bacterial composition. Indeed, the relative abundance of  
194 two families (*Christensenellaceae*, *Clostridiales vadinBB60*) and two genera (*Christensenellaceae R-7*  
195 *group* and *Ruminococcaceae UCG-002*) were higher in piglets from maternity 2. Members of these  
196 bacterial groups are known to be involved in the degradation of plant derived carbohydrates (Biddle *et*  
197 *al.*, 2013; Louis and Flint, 2017; La Reau and Suen, 2018). Overall, our data obtained during the

198 suckling period show that maternal environment influences the microbiota metabolic activity and  
199 composition in piglets. More work is needed to determine which factors of the maternal environment  
200 drive these effects (e.g. mother diet, creep feed intake, housing, hygiene, animal handling, etc.)  
201 (Mulder *et al.*, 2009; Montagne *et al.*, 2010; Megahed *et al.*, 2019).

202 Despite the effects of weaning on the production of bacterial metabolites were specific to each  
203 maternity farm, some of the effects of weaning on the microbiota diversity and composition were  
204 observed in piglets from the two maternity farms. There was an increase in OTU richness after  
205 weaning, which is in agreement with previous studies in piglets (Frese *et al.*, 2015; Chen *et al.*, 2017;  
206 De Rodas *et al.*, 2018). Indeed, the cessation of milk ingestion, the introduction of new plant  
207 substrates and the modification of housing environment might contribute to the colonization of the gut  
208 by new bacterial species. The relative abundances of Lactobacillaceae and *Lactobacillus* decreased  
209 after weaning in piglets from the two maternity farms, as previously observed in numerous studies in  
210 piglets (Mach *et al.*, 2015; Slifierz *et al.*, 2015; Bian *et al.*, 2016; Chen *et al.*, 2017; De Rodas *et al.*,  
211 2018; Guevarra *et al.*, 2018). Members of the *Lactobacillus* genus are specialized in the degradation of  
212 lactose (W. Wang *et al.*, 2019), the main sugar provided by maternal milk (4.8% in pigs vs 6.8% in  
213 humans) (Zhang *et al.*, 2018). In contrast, the relative abundances of Ruminococcaceae and  
214 *Ruminococcus 2* increased after weaning in piglets from the two maternity farms, as previously  
215 observed in other studies (Frese *et al.*, 2015; Bian *et al.*, 2016; Chen *et al.*, 2017). The  
216 Ruminococcaceae family is well known to play an important role in the degradation of complex plant  
217 polysaccharides (La Reau and Suen, 2018). Thus, the increased abundance of Ruminococcaceae after  
218 weaning highlights the adaptation of the microbiota to the supply of plant-derived substrates  
219 concomitant with suckling cessation.

220 The taxonomic changes observed after weaning in piglets from both maternity farms were associated  
221 with a major shift in the predicted functionality of the microbiota. Indeed, the relative abundance of  
222 62% of the predicted pathways was altered after weaning. Among them, the relative abundance of the  
223 “Fucose degradation” pathway decreased in piglets from the two maternity farms. Fucose is a  
224 monosaccharide present in milk oligosaccharides (fucosylated oligosaccharides represent 9.1% of total  
225 milk oligosaccharides in sow) (Salcedo *et al.*, 2016). Thus, the predicted decrease in the relative

226 abundance of the “Fucose degradation” pathway might be driven by suckling cessation at weaning.  
227 The OTU contributing the most to this predicted pathway was classified in Enterobacteriaceae  
228 (dominant family during the suckling period). This result is in agreement with a study using shotgun  
229 metagenomics in suckling piglets showing that the majority of genes related to fucose utilization were  
230 assigned to Enterobacteriaceae (Salcedo *et al.*, 2016). Another interesting result was the increased  
231 relative abundance of the predicted pathway “Starch degradation V” after weaning in piglets from both  
232 maternity farms. Starch is an important source of carbohydrates for the microbiota of weaned piglets  
233 (W. Wang *et al.*, 2019). Our functional predictions are in agreement with a shotgun metagenomic  
234 study showing that bacterial genes coding for starch degrading-enzymes were more abundant after  
235 weaning in piglets (Frese *et al.*, 2015). We also found that after weaning the OTU contributing the  
236 most to the “Starch degradation V” predicted pathway was assigned to *Ruminococcaceae*.  
237 Accordingly, a member of this family, *Ruminococcus bromii*, was demonstrated to be a key stone  
238 species for starch degradation in the human microbiota (Ze *et al.*, 2012). Overall, our results suggest  
239 that suckling cessation and the shift to a plant based diet drive the maturation of the microbiota  
240 composition and predicted functionality observed after weaning in piglets.

241 In contrast to the shared effects of weaning on the microbiota composition and predicted functionality  
242 observed in piglets from the two maternity farms, the alteration of bacterial metabolites production  
243 was specific to piglets from each maternity farm. In piglets from maternity 1, there was a reduction of  
244 the relative concentrations of biogenic amines (cadaverine, tyramine and 5-aminovalerate) after  
245 weaning. These metabolites are produced by the gut microbiota from amino acids degradation (lysine,  
246 tyrosine and proline, respectively) (Barker *et al.*, 1987; Portune *et al.*, 2016). The relevance for gut  
247 health of these bacterial biogenic amines is difficult to predict since both protective and toxic effects  
248 have been described, mostly depending on the concentration (Louis *et al.*, 2014; Blander *et al.*, 2017;  
249 Oliphant and Allen-Vercoe, 2019). The reduction of their concentration after weaning might be linked  
250 to the decreased relative abundance of Enterobacteriaceae, members of this family being known to  
251 produce biogenic amines (Oliphant and Allen-Vercoe, 2019; Tofalo *et al.*, 2019). The decrease after  
252 weaning of the relative abundance of Proteobacteria, Enterobacteriaceae and *Escherichia-Shigella*  
253 (11.4% during the suckling period vs 4.6% after weaning) observed in piglets from maternity 1 is in

254 agreement with several previous studies in piglets (Frese *et al.*, 2015; Bian *et al.*, 2016; De Rodas *et*  
255 *al.*, 2018). The high abundance of Enterobacteriaceae in early life can be linked to their adaptation to  
256 use substrates available in the gut of suckling mammals. Indeed, some species including members of  
257 the *Bacteroides* degrade milk oligosaccharides externally which releases free sugars in the lumen that  
258 can promote the growth of Enterobacteriaceae through cross-feeding reactions (Charbonneau *et al.*,  
259 2016). Thus, the reduction after weaning of the relative abundance of Enterobacteriaceae in piglets  
260 from maternity 1 might be related to the cessation of suckling. In these piglets, there was also an  
261 increase after weaning in the relative concentrations of acetate and propionate. This increase in SCFA  
262 concentration after weaning was reported previously in piglets (van Beers-Schreurs *et al.*, 1998) and  
263 might have protective effects for gut health due to their capacity to reinforce the mucosal barrier and to  
264 support immune functions (Koh *et al.*, 2016). The upregulation of acetate and propionate production  
265 by the microbiota at weaning reflects the metabolic adaptation of the gut bacteria to solid feed derived  
266 substrates since these SCFAs are produced mainly through plant carbohydrate fermentation (Louis and  
267 Flint, 2017). Besides this substrate effects, the increase SCFA production in piglets from maternity 1  
268 after weaning might also be linked to the increase in the relative abundance of the Christensenellaceae,  
269 *Christensenellaceae R-7 group* and *Ruminococcaceae UCG-002*, also observed in previous studies  
270 (Frese *et al.*, 2015; Bian *et al.*, 2016; Chen *et al.*, 2017). The ability of these bacterial groups to break  
271 down complex plant polysaccharides suggests that the shift from maternal milk to a plant based diet  
272 favored their growth (La Reau and Suen, 2018). In summary, the changes in microbiota metabolic  
273 activity and composition observed at weaning only in piglets from maternity 1 were probably driven  
274 by an abrupt dietary shift from milk-derived substrates (e.g. oligosaccharides) to plant-derived  
275 substrates.

276 Strikingly, most of the modification observed after weaning in piglets from maternity 1 were not found  
277 in piglets from maternity 2. This might be linked to the more “mature state” of the microbiota  
278 composition and metabolic activity observed already during the suckling period in these piglets, as  
279 discussed above (e.g. higher relative abundance of *Ruminococcaceae UCG-002* and  
280 *Christensenellaceae R-7 group* and higher relative concentration of SCFA). Interestingly, some  
281 differences observed during the suckling period (e.g. higher relative abundance of *Ruminococcaceae*

282 *UCG-002*) were still found after weaning, showing a persistent effect of the maternal environment.  
283 Thus, our study highlights the importance of early life environment on the microbiota composition and  
284 functionality during the suckling period but also after weaning.  
285 In conclusion, our study shows that the functional maturation of the microbiota at weaning is  
286 influenced by early life environment in piglets. Since this alteration of the microbiota functionality at  
287 the suckling-to-solid food transition might play a key role in intestinal and immune maturation  
288 (Hooper, 2004; Al Nabhani and Eberl, 2020), a perspective of our work would be to determine what  
289 are the effects on the gut barrier function of the metabolites produced by piglet microbiota before or  
290 after weaning. In this context, the recent development of pig intestinal organoids represent a great  
291 opportunity to decipher the action of gut microbiota derived metabolites on piglet epithelial cells (van  
292 der Hee *et al.*, 2018). Subsequently, innovative strategies based on the control of early life  
293 environment might be developed to orient the metabolic activity of the microbiota towards the  
294 production of protective metabolites promoting intestinal development and long-term health.

## 295 **EXPERIMENTAL PROCEDURES**

### 296 **Animals**

297 The experiments were performed in two separate maternity farms (maternity 1 and maternity 2) and  
298 one post-weaning farm, all located in Morbihan, France. Piglets (Piétrain x Large white x Landrace)  
299 were housed in maternity 1 (n=14 piglets/10 sows) or maternity 2 (n=14 piglets/9 sows) from birth to  
300 day 21 (weaning day) (figure 1). Chemical composition of gestation and lactation diets of sows from  
301 the two maternity farms are shown in table S1. Suckling piglets had access to creep feed from day 1 in  
302 maternity 1 and from day 7 in maternity 2 (chemical composition of piglets diets shown in table S1).  
303 At weaning (day 21), piglets from the two maternity farms were moved to a single post-weaning farm  
304 and mixed in the same pens in one room. After weaning, all piglets had access to the same diet (table  
305 S1). None of the piglets received antibiotic treatment. Fecal samples were collected during the  
306 suckling period (day 13) and two days after weaning (day 23) from the same piglets and stored at -  
307 80°C until analysis.

308

### 309 **16S rRNA gene sequencing and sequences analysis**

310 Fecal DNA was extracted using Quick-DNA Fecal/Soil Microbe 96 Kit (ZymoResearch, Irvine, CA)  
311 and the 16S rRNA V3-V4 region was amplified by PCR and sequenced by MiSeq Illumina  
312 Sequencing as previously described (Verschuren *et al.*, 2018). Sequencing reads were deposited in the  
313 National Center for Biotechnology Information Sequence Read Archive (SRA accession:  
314 PRJNA591810). 16S rDNA amplicon sequences were analyzed using the FROGS pipeline according  
315 to standard operating procedures (Escudié *et al.*, 2018). Amplicons were filtered according to their size  
316 (400-500 nucleotides) and clustered into OTUs using Swarm (aggregation distance:  $d=1 + d=3$ ). After  
317 chimera removal, OTUs were kept when representing more than 0.005% of the total number of  
318 sequences (Bokulich *et al.*, 2013). OTUs affiliation was performed using the reference database  
319 silva132 16S with a minimum pintail quality of 80 (Quast *et al.*, 2013). The mean number of reads per  
320 sample was 15 639 (min: 9 694 - max: 30 724). The functional potential of the microbiota was  
321 predicted by using PICRUST2 (Douglas *et al.*, 2019) according to the guidelines with the unrarefied  
322 OTU abundance table as input. Relative predicted abundance of MetaCyc pathways were calculated

323 by dividing the abundance of each pathway by the sum of all pathways abundances per sample.  
324 Relative contribution of each OTU to predicted pathways was calculated by dividing the contribution  
325 of each OTU by the sum of all contributions per sample.

326

### 327 **NMR metabolomics**

328 Feces (100 mg) were homogenized in 500  $\mu$ L phosphate buffer (prepared in D<sub>2</sub>O, pH7, TSP 1 mM) in  
329 2mL FastPrep tubes (Lysing D matrix) by using a FastPrep Instrument (MP biomedical, Irvine, CA).  
330 After centrifugation (12 000 g, 4°C, 10 min), supernatants were collected. The extraction step was  
331 repeated on the pellet. Supernatants were pooled and centrifuged twice (18 000 g, 30 min, 4°C). The  
332 resulting supernatant (600  $\mu$ L) was transferred to a 5 mm NMR tube. All NMR spectra were obtained  
333 with an Avance III HD NMR spectrometer operating at 600.13 MHz for <sup>1</sup>H resonance frequency using  
334 a 5 mm inverse detection CryoProbe (Bruker Biospin, Rheinstetten, Germany) in the MetaboHUB-  
335 MetaToul-AXIOM metabolomics platform (Toulouse, France). <sup>1</sup>H NMR spectra were acquired at 300  
336 K using the Carr-Purcell-Meiboom-Gill spin-echo pulse sequence with presaturation. Pre-processing  
337 of the spectra (group delay correction, solvent suppression, apodization with a line broadening of 0.3  
338 Hz, Fourier transform, zero order phase correction, shift referencing on TSP, baseline correction,  
339 setting of negative values to zero) was performed in the galaxy tool Workflow4Metabolomics  
340 following guidelines (Giacomoni *et al.*, 2015). After water region (4.5 – 5.1 ppm) exclusion, spectra  
341 (0.5 – 9 ppm) were bucketed (0.01 ppm bucket width) and normalized by total area in  
342 Workflow4Metabolomics. Representative samples were characterized by 2D NMR experiments (<sup>1</sup>H-  
343 <sup>1</sup>H COSY and <sup>13</sup>C-<sup>1</sup>H HSQC). For metabolite identification, 1D and 2D NMR spectra of pure  
344 compounds prepared in the same buffer and acquired with the same spectrometer were overlaid with  
345 samples spectra. Annotated representative spectra are presented in figure 2. For each identified  
346 metabolite, buckets non-overlapping with other metabolites were selected for the quantification (table  
347 1).

348

### 349 **Statistical analysis**



350 All statistical analysis were performed using the R software (version 3.5.1). PLS-DA was performed  
351 with the mixOmics package (Rohart *et al.*, 2017). Metabolites relative concentrations were used as  
352 variable matrix (X). Experimental groups (defined by day and maternity) were used as predictors (Y).  
353 The microbiota composition analysis was performed using the phyloseq package (McMurdie and  
354 Holmes, 2013). For  $\alpha$  and  $\beta$  diversity analyses, the samples were rarefied to even sequencing depth  
355 (9 694 reads per sample). Richness (observed OTUs), Shannon and Inverse Simpson  $\alpha$ -diversity  
356 indices were calculated. The  $\beta$ -diversity was analyzed using the Bray-Curtis distance and plotted by  
357 non-Metric Dimensional Scaling (nMDS). Bacterial taxa differential abundance analysis was  
358 performed with unrarefied data. OTUs representing less than 0.05% of the total number of sequences  
359 were filtered out. OTUs were agglomerated at phylum, family or genus level and relative abundances  
360 were calculated at each taxonomic level. Heatmaps and clustering analysis (average method) were  
361 performed with the made4 package. All univariate analyses were performed with a linear mixed model  
362 (lme4 package) with the fixed effects of age (day 13 or day 23), maternity (maternity 1 or 2) and their  
363 interaction, while piglet and sow were used as random effect. The relative abundances of bacterial  
364 groups, the relative abundances of predicted pathways and the relative contributions of OTUs to  
365 predicted pathways were log transformed. Analysis of variance was performed with the car package  
366 and P values were adjusted for multiple testing with the false discovery rate (FDR) procedure. Means  
367 of each group were compared pairwise with the emmeans package (Tukey correction).  $P < 0.05$  were  
368 considered significant.

369 **ACKNOWLEDGMENTS**

370 The authors are grateful to the genotoul bioinformatics platform Toulouse Occitanie (Bioinfo  
371 Genotoul, doi: 10.15454/1.5572369328961167E12) and Sigena group for providing computing and  
372 storage resources to Galaxy instance (<http://sigena-workbench.toulouse.inra.fr>).

373

374 **AUTHOR CONTRIBUTIONS**

375 AS and SC conceived the experiments. MB, IA, CB, OB performed the experiments. MB, LC, AB,  
376 CC, OZ, GP, AS, SC analyzed the data. MB, AS and SC wrote the manuscript.

377

378 **FINANCIAL SUPPORT**

379 The present work received the financial support from NEOVIA-ADM.

380

381 **CONFLICT OF INTEREST**

382 The authors declare no conflict of interest.

383 **REFERENCES**

- 384 Al Nabhani, Z., Dulauroy, S., Lécuyer, E., Polomack, B., Campagne, P., Berard, M., and Eberl, G. (2019)  
385 Excess calorie intake early in life increases susceptibility to colitis in adulthood. *Nat Metab* **1**:  
386 1101–1109.
- 387 Al Nabhani, Z., Dulauroy, S., Marques, R., Cousu, C., Al Bounny, S., Déjardin, F., et al. (2019) A  
388 Weaning Reaction to Microbiota Is Required for Resistance to Immunopathologies in the  
389 Adult. *Immunity* **50**: 1276-1288.e5.
- 390 Al Nabhani, Z. and Eberl, G. (2020) Imprinting of the immune system by the microbiota early in life.  
391 *Mucosal Immunol* 1–7.
- 392 Barker, H.A., D'Ari, L., and Kahn, J. (1987) Enzymatic reactions in the degradation of 5-aminovalerate  
393 by *Clostridium aminovalericum*. *J Biol Chem* **262**: 8994–9003.
- 394 van Beers-Schreurs, H.M.G., Nabuurs, M.J.A., Vellenga, Valk, H.J.K. der, Wensing, T., and Breukink,  
395 H.J. (1998) Weaning and the Weanling Diet Influence the Villous Height and Crypt Depth in  
396 the Small Intestine of Pigs and Alter the Concentrations of Short-Chain Fatty Acids in the  
397 Large Intestine and Blood. *J Nutr* **128**: 947–953.
- 398 Bian, G., Ma, S., Zhu, Z., Su, Y., Zoetendal, E.G., Mackie, R., et al. (2016) Age, introduction of solid  
399 feed and weaning are more important determinants of gut bacterial succession in piglets  
400 than breed and nursing mother as revealed by a reciprocal cross-fostering model: Gut  
401 bacterial succession in piglets. *Environmental Microbiology* **18**: 1566–1577.
- 402 Biddle, A., Stewart, L., Blanchard, J., and Leschine, S. (2013) Untangling the Genetic Basis of Fibrolytic  
403 Specialization by Lachnospiraceae and Ruminococcaceae in Diverse Gut Communities.  
404 *Diversity* **5**: 627–640.
- 405 Blander, J.M., Longman, R.S., Iliev, I.D., Sonnenberg, G.F., and Artis, D. (2017) Regulation of  
406 inflammation by microbiota interactions with the host. *Nature Immunology* **18**: 851–860.
- 407 Bokulich, N.A., Subramanian, S., Faith, J.J., Gevers, D., Gordon, J.I., Knight, R., et al. (2013) Quality-  
408 filtering vastly improves diversity estimates from Illumina amplicon sequencing. *Nat Methods*  
409 **10**: 57–59.
- 410 Charbonneau, M.R., Blanton, L.V., DiGiulio, D.B., Relman, D.A., Lebrilla, C.B., Mills, D.A., and Gordon,  
411 J.I. (2016) A microbial perspective of human developmental biology. *Nature* **535**: 48–55.
- 412 Chen, L., Xu, Y., Chen, X., Fang, C., Zhao, L., and Chen, F. (2017) The Maturing Development of Gut  
413 Microbiota in Commercial Piglets during the Weaning Transition. *Frontiers in Microbiology* **8**:.
- 414 De Rodas, B., Youmans, B.P., Danzeisen, J.L., Tran, H., and Johnson, T.J. (2018) Microbiome profiling  
415 of commercial pigs from farrow to finish. *J Anim Sci* **96**: 1778–1794.
- 416 Douglas, G.M., Maffei, V.J., Zaneveld, J., Yurgel, S.N., Brown, J.R., Taylor, C.M., et al. (2019) PICRUSt2:  
417 An improved and extensible approach for metagenome inference. *bioRxiv* 672295.
- 418 Escudié, F., Auer, L., Bernard, M., Mariadassou, M., Cauquil, L., Vidal, K., et al. (2018) FROGS: Find,  
419 Rapidly, OTUs with Galaxy Solution. *Bioinformatics* **34**: 1287–1294.
- 420 Frese, S.A., Parker, K., Calvert, C.C., and Mills, D.A. (2015) Diet shapes the gut microbiome of pigs  
421 during nursing and weaning. *Microbiome* **3**: 28.
- 422 Giacomoni, F., Le Corguillé, G., Monsoor, M., Landi, M., Pericard, P., Pétéra, M., et al. (2015)  
423 Workflow4Metabolomics: a collaborative research infrastructure for computational  
424 metabolomics. *Bioinformatics* **31**: 1493–1495.
- 425 Gresse, R., Chaucheyras-Durand, F., Fleury, M.A., Van de Wiele, T., Forano, E., and Blanquet-Diot, S.  
426 (2017) Gut Microbiota Dysbiosis in Postweaning Piglets: Understanding the Keys to Health.  
427 *Trends in Microbiology* **25**: 851–873.
- 428 Guevarra, R.B., Hong, S.H., Cho, J.H., Kim, B.-R., Shin, J., Lee, J.H., et al. (2018) The dynamics of the  
429 piglet gut microbiome during the weaning transition in association with health and nutrition.  
430 *Journal of Animal Science and Biotechnology* **9**: 54.
- 431 van der Hee, B., Loonen, L.M.P., Taverne, N., Taverne-Thiele, J.J., Smidt, H., and Wells, J.M. (2018)  
432 Optimized procedures for generating an enhanced, near physiological 2D culture system  
433 from porcine intestinal organoids. *Stem Cell Research* **28**: 165–171.

- 434 Heinritz, S.N., Mosenthin, R., and Weiss, E. (2013) Use of pigs as a potential model for research into  
435 dietary modulation of the human gut microbiota. *Nutrition Research Reviews* **26**: 191–209.
- 436 Hooper, L.V. (2004) Bacterial contributions to mammalian gut development. *Trends Microbiol* **12**:  
437 129–134.
- 438 Jain, N. and Walker, W.A. (2015) Diet and host-microbial crosstalk in postnatal intestinal immune  
439 homeostasis. *Nat Rev Gastroenterol Hepatol* **12**: 14–25.
- 440 Koh, A., De Vadder, F., Kovatcheva-Datchary, P., and Bäckhed, F. (2016) From Dietary Fiber to Host  
441 Physiology: Short-Chain Fatty Acids as Key Bacterial Metabolites. *Cell* **165**: 1332–1345.
- 442 La Reau, A.J. and Suen, G. (2018) The Ruminococci: key symbionts of the gut ecosystem. *J Microbiol*  
443 **56**: 199–208.
- 444 Li, N., Huang, S., Jiang, L., Wang, W., Li, T., Zuo, B., et al. (2018) Differences in the Gut Microbiota  
445 Establishment and Metabolome Characteristics Between Low- and Normal-Birth-Weight  
446 Piglets During Early-Life. *Front Microbiol* **9**:.
- 447 Louis, P. and Flint, H.J. (2017) Formation of propionate and butyrate by the human colonic  
448 microbiota. *Environmental Microbiology* **19**: 29–41.
- 449 Louis, P., Hold, G.L., and Flint, H.J. (2014) The gut microbiota, bacterial metabolites and colorectal  
450 cancer. *Nat Rev Microbiol* **12**: 661–672.
- 451 Lu, D., Tiezzi, F., Schillebeeckx, C., McNulty, N.P., Schwab, C., Shull, C., and Maltecca, C. (2018) Host  
452 contributes to longitudinal diversity of fecal microbiota in swine selected for lean growth.  
453 *Microbiome* **6**: 4.
- 454 Mach, N., Berri, M., Estellé, J., Levenez, F., Lemonnier, G., Denis, C., et al. (2015) Early-life  
455 establishment of the swine gut microbiome and impact on host phenotypes: Role of early-life  
456 gut microbiome on pigs' health. *Environmental Microbiology Reports* **7**: 554–569.
- 457 Macpherson, A.J., Agüero, M.G. de, and Ganal-Vonarburg, S.C. (2017) How nutrition and the  
458 maternal microbiota shape the neonatal immune system. *Nat Rev Immunol* **17**: 508–517.
- 459 McMurdie, P.J. and Holmes, S. (2013) phyloseq: an R package for reproducible interactive analysis  
460 and graphics of microbiome census data. *PLoS ONE* **8**: e61217.
- 461 Megahed, A., Zeineldin, M., Evans, K., Maradiaga, N., Blair, B., Aldridge, B., and Lowe, J. (2019)  
462 Impacts of environmental complexity on respiratory and gut microbiome community  
463 structure and diversity in growing pigs. *Sci Rep* **9**: 1–12.
- 464 Montagne, L., Arturo-Schaan, M., Le Floc'h, N., Guerra, L., and Le Gall, M. (2010) Effect of sanitary  
465 conditions and dietary fibre on the adaptation of gut microbiota after weaning. *Livestock*  
466 *Science* **133**: 113–116.
- 467 Mulder, I.E., Schmidt, B., Stokes, C.R., Lewis, M., Bailey, M., Aminov, R.I., et al. (2009)  
468 Environmentally-acquired bacteria influence microbial diversity and natural innate immune  
469 responses at gut surfaces. *BMC Biology* **7**: 79.
- 470 Newberry, R.C. and Wood-Gush, D.G.M. (1985) The Suckling Behaviour of Domestic Pigs in a Semi-  
471 Natural Environment. *Behaviour* **95**: 11–25.
- 472 Oliphant, K. and Allen-Vercoe, E. (2019) Macronutrient metabolism by the human gut microbiome:  
473 major fermentation by-products and their impact on host health. *Microbiome* **7**: 91.
- 474 Portune, K.J., Beaumont, M., Davila, A.-M., Tomé, D., Blachier, F., and Sanz, Y. (2016) Gut microbiota  
475 role in dietary protein metabolism and health-related outcomes: The two sides of the coin.  
476 *Trends in Food Science & Technology* **57**: 213–232.
- 477 Quast, C., Pruesse, E., Yilmaz, P., Gerken, J., Schweer, T., Yarza, P., et al. (2013) The SILVA ribosomal  
478 RNA gene database project: improved data processing and web-based tools. *Nucleic Acids*  
479 *Res* **41**: D590-596.
- 480 Rohart, F., Gautier, B., Singh, A., and Cao, K.-A.L. (2017) mixOmics: An R package for 'omics feature  
481 selection and multiple data integration. *PLOS Computational Biology* **13**: e1005752.
- 482 Salcedo, J., Frese, S.A., Mills, D.A., and Barile, D. (2016) Characterization of porcine milk  
483 oligosaccharides during early lactation and their relation to the fecal microbiome. *J Dairy Sci*  
484 **99**: 7733–7743.

- 485 Slifierz, M.J., Friendship, R.M., and Weese, J.S. (2015) Longitudinal study of the early-life fecal and  
486 nasal microbiotas of the domestic pig. *BMC Microbiology* **15**: 184.
- 487 Tofalo, R., Cocchi, S., and Suzzi, G. (2019) Polyamines and Gut Microbiota. *Front Nutr* **6**:.  
488 Verschuren, L.M.G., Calus, M.P.L., Jansman, A.J.M., Bergsma, R., Knol, E.F., Gilbert, H., and Zemb, O.  
489 (2018) Fecal microbial composition associated with variation in feed efficiency in pigs  
490 depends on diet and sex. *J Anim Sci* **96**: 1405–1418.
- 491 Voreades, N., Kozil, A., and Weir, T.L. (2014) Diet and the development of the human intestinal  
492 microbiome. *Front Microbiol* **5**: 494.
- 493 Wang, W., Hu, H., Zijlstra, R.T., Zheng, J., and Gänzle, M.G. (2019) Metagenomic reconstructions of  
494 gut microbial metabolism in weanling pigs. *Microbiome* **7**: 48.
- 495 Wang, X., Tsai, T., Deng, F., Wei, X., Chai, J., Knapp, J., et al. (2019) Longitudinal investigation of the  
496 swine gut microbiome from birth to market reveals stage and growth performance  
497 associated bacteria. *Microbiome* **7**: 109.
- 498 Ze, X., Duncan, S.H., Louis, P., and Flint, H.J. (2012) *Ruminococcus bromii* is a keystone species for the  
499 degradation of resistant starch in the human colon. *ISME J* **6**: 1535–1543.
- 500 Zhang, S., Chen, F., Zhang, Y., Lv, Y., Heng, J., Min, T., et al. (2018) Recent progress of porcine milk  
501 components and mammary gland function. *J Anim Sci Biotechnol* **9**:.  
502

503 **TABLES**

504 **Table 1: Metabolites identified by NMR metabolomics in piglet fecal samples.** \*: indicates the  
505 peak used for quantification based on the corresponding bucket intensity (not overlapping with peaks  
506 from other metabolites). Multiplicity of signals is indicated within brackets: s, singlet; d, doublet; dd,  
507 doublet of doublet; t, triplet; q, quadruplet and m, multiplet.  
508

509

|    | Metabolite                    | $\delta^1\text{H}$ (ppm)                                                                                              |
|----|-------------------------------|-----------------------------------------------------------------------------------------------------------------------|
| 1  | 2-methylbutyrate              | 0.86* (t), 1.05 (d), 1.39 (m), 1.49 (m), 2.1 (m)                                                                      |
| 2  | Valerate                      | 0.89 (t), 1.30* (m), 1.53 (m), 2.19 (t)                                                                               |
| 3  | Butyrate                      | 0.90* (t), 1.56 (m), 2.16 (t)                                                                                         |
| 4  | Isovalerate                   | 0.92 (d), 1.96 (m), 2.06* (d)                                                                                         |
| 5  | 4-methyl-2-oxovalerate        | 0.94 (d), 2.10 (m), 2.62* (d)                                                                                         |
| 6  | Isoleucine                    | 0.94 (t), 1.01* (d), 1.27 (m), 1.47 (m), 1.99 (m), 3.68 (d)                                                           |
| 7  | Leucine                       | 0.97* (t), 1.72 (m), 3.74 (m)                                                                                         |
| 8  | Valine                        | 1.00* (d), 1.05 (d), 2.28 (m), 3.62 (d)                                                                               |
| 9  | Propionate                    | 1.06* (t), 2.19 (m)                                                                                                   |
| 10 | Isobutyrate                   | 1.07 (d), 2.39* (m)                                                                                                   |
| 11 | 3-methyl-2-oxovalerate        | 0.90 (t), 1.10* (d), 1.46 (m), 1.71 (m), 2.94 (m)                                                                     |
| 12 | 3-methyl-2-oxobutyrate        | 0.90 (d), 1.13* (d), 3.03 (m)                                                                                         |
| 13 | Threonine                     | 1.34* (d), 4.26 (m)                                                                                                   |
| 14 | Cadaverine                    | 1.48 (m), 1.73* (m), 3.02 (t)                                                                                         |
| 15 | 5-aminovalerate               | 1.65 (m), 2.24* (t), 3.02 (t)                                                                                         |
| 16 | Putrescine                    | 1.78* (m), 3.06 (m)                                                                                                   |
| 17 | Acetate                       | 1.92* (s)                                                                                                             |
| 18 | Glutamate                     | 2.07 (m), 2.14 (m), 2.35* (m), 3.77 (m)                                                                               |
| 19 | Succinate                     | 2.41* (s)                                                                                                             |
| 20 | Methylamine                   | 2.60* (s)                                                                                                             |
| 21 | Methionine                    | 2.14 (s), 2.14 (m), 2.20 (m), 2.65* (t), 3.87 (m)                                                                     |
| 22 | Dimethylamine                 | 2.72* (s)                                                                                                             |
| 23 | Trimethylamine                | 2.88* (s)                                                                                                             |
| 24 | Tyramine                      | 2.94 (t), 3.24 (t), 6.92 (d), 7.23* (d)                                                                               |
| 25 | Choline                       | 3.21* (s), 3.53 (m), 4.07 (m)                                                                                         |
| 26 | Glucose                       | 3.26 (m), 3.39 – 3.56 (m), 3.70 – 3.91 (m), 5.24* (d)                                                                 |
| 27 | Phenylacetate                 | 3.54* (s), 7.31 (m), 7.38 (m)                                                                                         |
| 28 | Glycine                       | 3.57* (s)                                                                                                             |
| 29 | Glycerol                      | 3.56 (dd), 3.66* (dd), 3.79 (m)                                                                                       |
| 30 | Ribose                        | 3.53 (m), 3.62 (dd), 3.66 (m), 3.69 (dd), 3.76 (dd), 3.80-4.02 (m), 4.11* (t), 4.14 (m), 4.22 (m), 5.26 (s), 5.39 (d) |
| 31 | Dihydroxyacetone              | 4.42* (s)                                                                                                             |
| 32 | Galactose                     | 3.50 (dd), 3.66 (dd), 3.69-3.88 (m), 3.94 (d), 4.00 (d), 4.09 (m), 5.27* (d)                                          |
| 33 | Uracil                        | 5.81* (d), 7.56 (d)                                                                                                   |
| 34 | 3-(4-hydroxyphenyl)propionate | 2.45 (t), 2.81 (t), 6.86* (d), 7.18 (d)                                                                               |
| 35 | Tyrosine                      | 3.07 (dd), 3.20 (dd), 3.95 (dd), 6.90 (d), 7.20* (d)                                                                  |
| 36 | Phenylalanine                 | 3.14 (dd), 3.29 (dd), 4.01 (dd), 7.33 (d), 7.38 (t), 7.43* (t)                                                        |
| 37 | Benzoate                      | 7.49* (t), 7.56 (t), 7.88 (d)                                                                                         |
| 38 | Hypoxanthine                  | 8.20* (s), 8.22 (s)                                                                                                   |
| 39 | Formate                       | 8.46* (s)                                                                                                             |

510

511

512

513

514 **FIGURE LEGENDS**

515 **Figure 1: Schematic representation of the experimental design.** Piglets from two separate  
516 maternity farms (n=14 piglets/maternity) were mixed at weaning (21 days after birth) in the same pens  
517 in one room. Fecal samples were collected from the same piglets during the suckling period (day 13)  
518 or 2 days after weaning (day 23).

519

520 **Figure 2: Identification of metabolites in piglets feces NMR spectra.**

521 Piglet fecal metabolome was analyzed by NMR metabolomics. A & B: Representative spectra during  
522 the suckling period (day 13). C & D: Representative spectra after weaning (day 23). The aliphatic (A,  
523 C) and aromatic (B, D – vertically expanded) regions are shown. Peaks are identified with a number  
524 corresponding to the metabolites described in table 1.

525

526 **Figure 3: Maternal environment and weaning influence the metabolic activity of the gut**  
527 **microbiota.** Metabolome was analyzed by NMR-based metabolomics in feces collected from piglets  
528 from two maternity farms (M1 and M2) during the suckling period (D13) and after weaning (D23). A  
529 – Individual plot of partial least square discriminant analysis (PLS-DA) with the relative concentration  
530 of metabolites used as variable matrix and groups as predictors. B – Heatmap representing the mean  
531 relative concentration of each metabolites in each group. The color represent the Z-scores (row-scaled  
532 relative concentration) from low (blue) to high values (red). Metabolites (rows) were clustered by the  
533 average method. A linear mixed model was used with age and maternity as fixed effects and sows and  
534 piglets as random effects. The means of groups associated with different letters are significantly  
535 different.

536

537 **Figure 4: Maternal environment and weaning influence diversity and structure of the gut**  
538 **microbiota.** The microbiota composition was analyzed by 16S rRNA gene sequencing in feces  
539 collected from piglets from two maternity farms (M1 and M2) during the suckling period (D13) and  
540 after weaning (D23). A -  $\alpha$ -diversity indices (Mean + SEM). A linear mixed model was used with age  
541 and maternity as fixed effects and sows and piglets as random effects. The means of groups associated



542 with different letters are significantly different. B - Non Metric Dimensional Scaling (nMDS) two-  
543 dimensional representation of the microbiota  $\beta$ -diversity using Bray Curtis distance calculation  
544 (stress=17.68).

545

546 **Figure 5: Maternal environment and weaning influence the composition of the gut microbiota.**

547 The microbiota composition was analyzed by 16S rRNA gene sequencing in feces collected from  
548 piglets from two maternity farms (M1 and M2) during the suckling period (D13) and after weaning  
549 (D23). A - Heatmap representing the mean relative abundance of bacterial families in each group. The  
550 color represent the Z-scores (row-scaled relative abundance) from low (blue) to high values (red).  
551 Families (rows) were clustered by the average method. B - Heatmap representing the mean relative  
552 abundance of bacterial genera in each group. The color represent the Z-scores (row-scaled relative  
553 abundance) from low (blue) to high values (red). Genus (rows) were clustered by the average method.  
554 The names of the 10 most abundant genera are indicated. After log transformation of bacterial groups  
555 relative abundances, a linear mixed model was used with age and maternity as fixed effects and sows  
556 and piglets as random effects. The means of groups associated with different letters are significantly  
557 different.

558

559 **Figure 6: Maternal environment and weaning influence the predicted functionality of the gut**

560 **microbiota.** The potential functionality of the gut microbiota was inferred from 16S rRNA amplicon  
561 sequences in feces collected from piglets from two maternity farms (M1 and M2) during the suckling  
562 period (D13) and after weaning (D23). A – Heatmap representing the mean relative abundance of each  
563 predicted pathways in each group. The color represent the Z-scores (row-scaled relative abundance)  
564 from low (blue) to high values (red). Predicted pathways (rows) were clustered by the average method.  
565 B – “Fucose degradation” predicted pathway. C – “Starch degradation V” predicted pathway. Left  
566 panels: relative abundance of the predicted pathway (mean + SEM). Right panels: relative contribution  
567 of the 5 OTUs contributing the most to the predicted pathway (means). After log transformation of  
568 bacterial predicted pathway relative abundances or OTU relative contribution to the pathway, a linear

569 mixed model was used with age and maternity as fixed effects and sows and piglets as random effects.

570 The means of groups associated with different letters are significantly different.

571 **SUPPLEMENTARY MATERIALS**

572 **Table S1: Chemical composition of sows and piglets diets.**

573

574 **Table S2: Univariate statistical analysis of metabolites relative concentrations in piglet feces.**

575 Metabolome was analyzed by NMR-based metabolomics in feces collected from piglets from two  
576 maternity farms (M1 and M2) during the suckling period (D13) and after weaning (D23). Columns B  
577 to D: For each metabolite (row), a linear mixed model was used with age and maternity as fixed  
578 effects and sows and piglets as random effects. P-values were adjusted with the false discovery rate  
579 (FDR) method. P-values < 0.05 are indicated in bold. Columns E to G: Non adjusted P-values.  
580 Columns H to K: Means were compared pairwise and p-values were adjusted with the Tukey method.  
581 The means of groups associated with different letters are significantly different (P<0.05). Columns L  
582 to O: The mean relative concentration of each metabolite is presented for each group.

583

584 **Table S3: Univariate statistical analysis of microbiota  $\alpha$ -diversity in piglet feces.** The microbiota

585 composition was analyzed by 16S rRNA gene in feces collected from piglets from two maternity  
586 farms (M1 and M2) during the suckling period (D13) and after weaning (D23). Columns B to D: For  
587 each  $\alpha$ -diversity index (row), a linear mixed model was used with age and maternity as fixed effects  
588 and sows and piglets as random effects. P-values < 0.05 are indicated in bold. Columns E to H: Means  
589 were compared pairwise and p-values were adjusted with the Tukey method. The means of groups  
590 associated with different letters are significantly different (P<0.05). Columns I to L: The mean of each  
591  $\alpha$ -diversity index is presented for each group.

592

593 **Table S4: Univariate statistical analysis of bacterial phyla relative abundance in piglet feces.** The

594 microbiota composition was analyzed by 16S rRNA gene in feces collected from piglets from two  
595 maternity farms (M1 and M2) during the suckling period (D13) and after weaning (D23). Columns B  
596 to D: For each phylum (row), a linear mixed model was used with age and maternity as fixed effects  
597 and sows and piglets as random effects. P-values were adjusted with the false discovery rate (FDR)  
598 method. P-values < 0.05 are indicated in bold. Columns E to G: Non adjusted P-values. Columns H to

599 K: Means were compared pairwise and p-values were adjusted with the Tukey method. The means of  
600 groups associated with different letters are significantly different ( $P < 0.05$ ). Columns L to O: The mean  
601 relative abundance of each phylum is presented for each group.

602

603 **Table S5: Univariate statistical analysis of bacterial families relative abundance in piglet feces.**

604 The microbiota composition was analyzed by 16S rRNA gene in feces collected from piglets from two  
605 maternity farms (M1 and M2) during the suckling period (D13) and after weaning (D23). Columns B  
606 to D: For each family (row), a linear mixed model was used with age and maternity as fixed effects  
607 and sows and piglets as random effects. P-values were adjusted with the false discovery rate (FDR)  
608 method. P-values  $< 0.05$  are indicated in bold. Columns E to G: Non adjusted P-values. Columns H to  
609 K: Means were compared pairwise and p-values were adjusted with the Tukey method. The means of  
610 groups associated with different letters are significantly different ( $P < 0.05$ ). Columns L to O: The mean  
611 relative abundance of each family is presented for each group.

612

613 **Table S6: Univariate statistical analysis of bacterial genera relative abundance in piglet feces.**

614 The microbiota composition was analyzed by 16S rRNA gene in feces collected from piglets from two  
615 maternity farms (M1 and M2) during the suckling period (D13) and after weaning (D23). Columns B  
616 to D: For each genus (row), a linear mixed model was used with age and maternity as fixed effects and  
617 sows and piglets as random effects. P-values were adjusted with the false discovery rate (FDR)  
618 method. P-values  $< 0.05$  are indicated in bold. Columns E to G: Non adjusted P-values. Columns H to  
619 K: Means were compared pairwise and p-values were adjusted with the Tukey method. The means of  
620 groups associated with different letters are significantly different ( $P < 0.05$ ). Columns L to O: The mean  
621 relative abundance of each genus is presented for each group.

622

623 **Table S7: Univariate statistical analysis of OTUs relative abundance in piglet feces.** The

624 microbiota composition was analyzed by 16S rRNA gene in feces collected from piglets from two  
625 maternity farms (M1 and M2) during the suckling period (D13) and after weaning (D23). Columns E  
626 to G: For each OTU (row), a linear mixed model was used with age and maternity as fixed effects and

627 sows and piglets as random effects. P-values were adjusted with the false discovery rate (FDR)  
628 method. P-values < 0.05 are indicated in bold. Columns H to J: Non adjusted P-values. Columns K to  
629 N: Means were compared pairwise and p-values were adjusted with the Tukey method. The means of  
630 groups associated with different letters are significantly different (P<0.05). Columns O to R: The mean  
631 relative abundance of each OTU is presented for each group.

632

633 **Table S8: Univariate statistical analysis of predicted bacterial pathways relative abundance in**  
634 **piglet feces.** The potential functionality of the gut microbiota was inferred from 16S rRNA amplicon  
635 sequences in feces collected from piglets from two maternity farms (M1 and M2) during the suckling  
636 period (D13) and after weaning (D23). Columns B to D: For each predicted pathway (row), a linear  
637 mixed model was used with age and maternity as fixed effects and sows and piglets as random effects.  
638 P-values were adjusted with the false discovery rate (FDR) method. P-values < 0.05 are indicated in  
639 bold. Columns E to G: Non adjusted P-values. Columns H to K: Means were compared pairwise and  
640 p-values were adjusted with the Tukey method. The means of groups associated with different letters  
641 are significantly different (P<0.05). Columns L to O: The mean relative abundance of each predicted  
642 pathway is presented for each group.

643

644 **Table S9: Univariate statistical analysis of the relative contribution of each OTU to the pathway**  
645 **“Fucose degradation”.** The relative contribution of each OTU to the predicted pathway was inferred  
646 from 16S rRNA amplicon sequences in feces collected from piglets from two maternity farms (M1  
647 and M2) during the suckling period (D13) and after weaning (D23). Columns B to D: For each OTU  
648 (row), a linear mixed model was used with age and maternity as fixed effects and sows and piglets as  
649 random effects. P-values were adjusted with the false discovery rate (FDR) method. P-values < 0.05  
650 are indicated in bold. Columns E to G: Non adjusted P-values. Columns H to K: Means were  
651 compared pairwise and p-values were adjusted with the Tukey method. The means of groups  
652 associated with different letters are significantly different (P<0.05). Columns L to O: The mean  
653 relative contribution of each OTU is presented for each group.

654

655 **Table S10: Univariate statistical analysis of the relative contribution of each OTU to the**  
656 **pathway “Starch degradation V”.** The relative contribution of each OTU to the predicted pathway  
657 was inferred from 16S rRNA amplicon sequences in feces collected from piglets from two maternity  
658 farms (M1 and M2) during the suckling period (D13) and after weaning (D23). Columns B to D: For  
659 each OTU (row), a linear mixed model was used with age and maternity as fixed effects and sows and  
660 piglets as random effects. P-values were adjusted with the false discovery rate (FDR) method. P-  
661 values < 0.05 are indicated in bold. Columns E to G: Non adjusted P-values. Columns H to K: Means  
662 were compared pairwise and p-values were adjusted with the Tukey method. The means of groups  
663 associated with different letters are significantly different ( $P < 0.05$ ). Columns L to O: The mean  
664 relative contribution of each OTU is presented for each group.

## Maternity 1

## Maternity 2

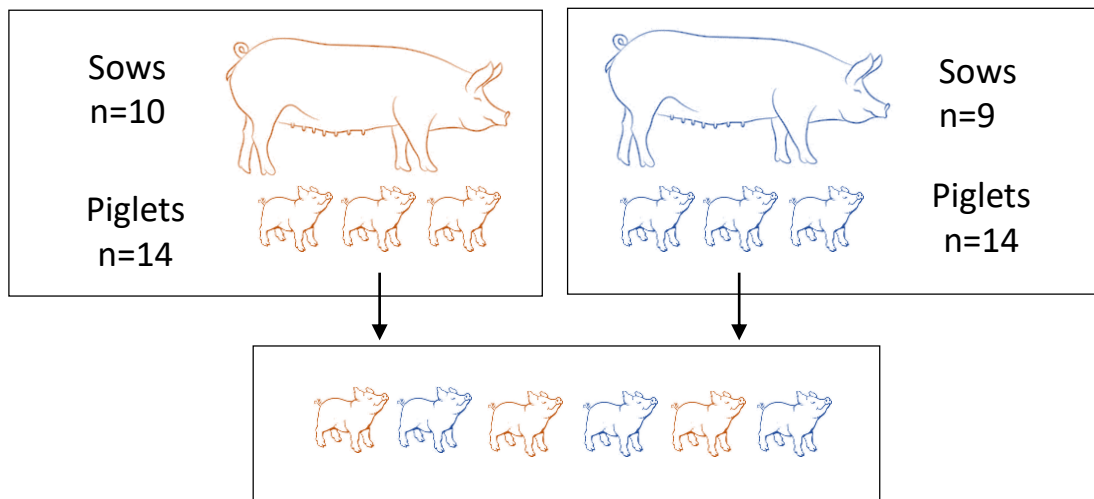

Days

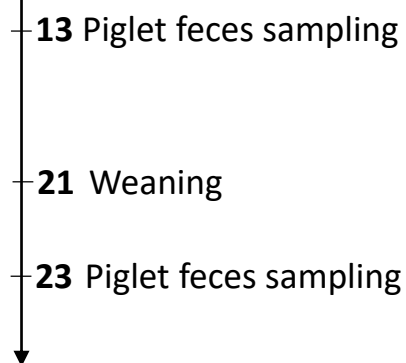

**Post-weaning unit**

**A**

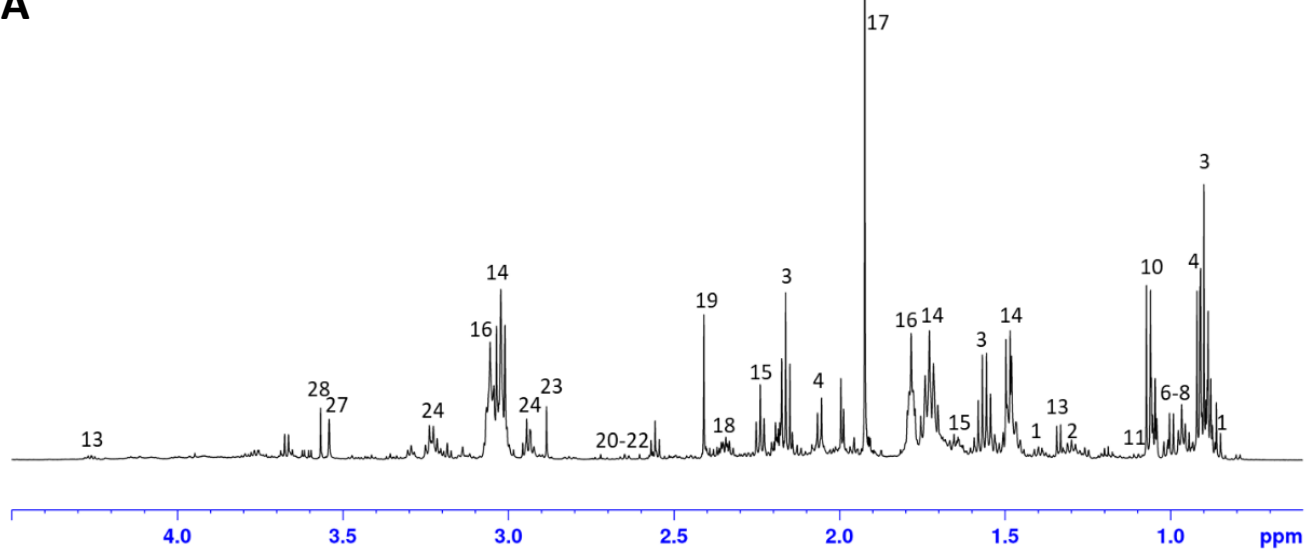

**B**

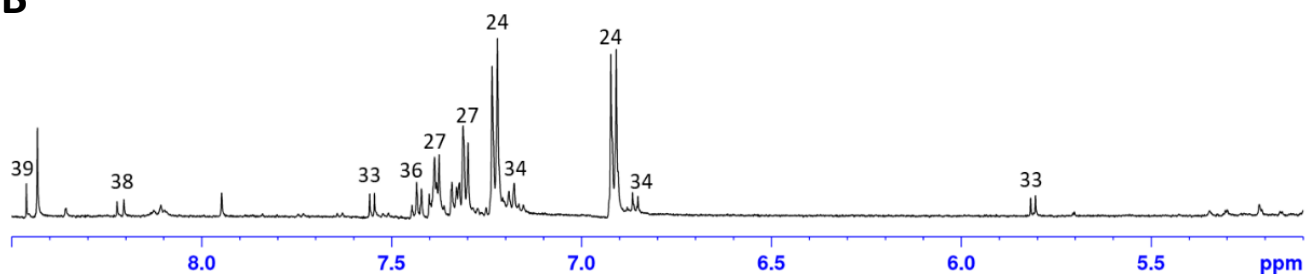

**C**

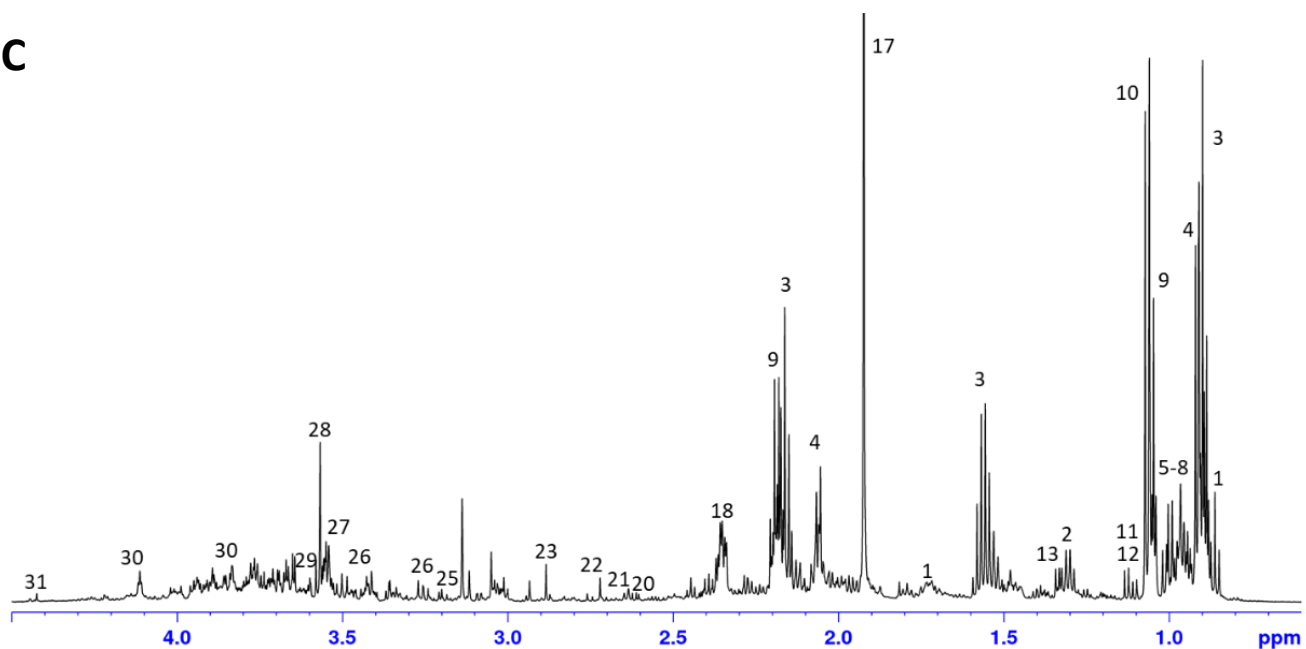

**D**

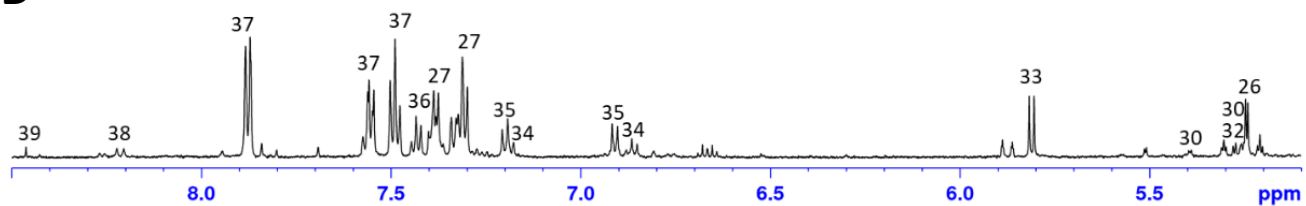



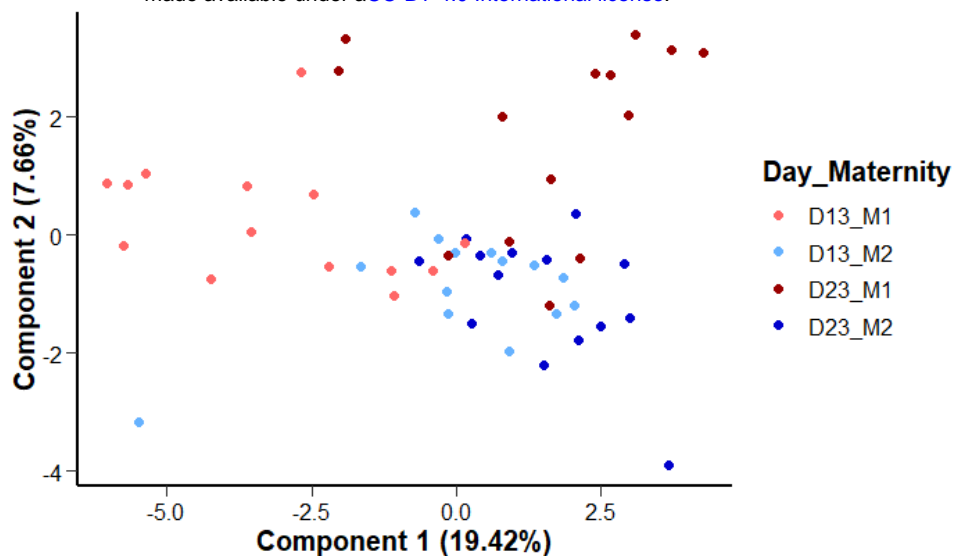

**B**

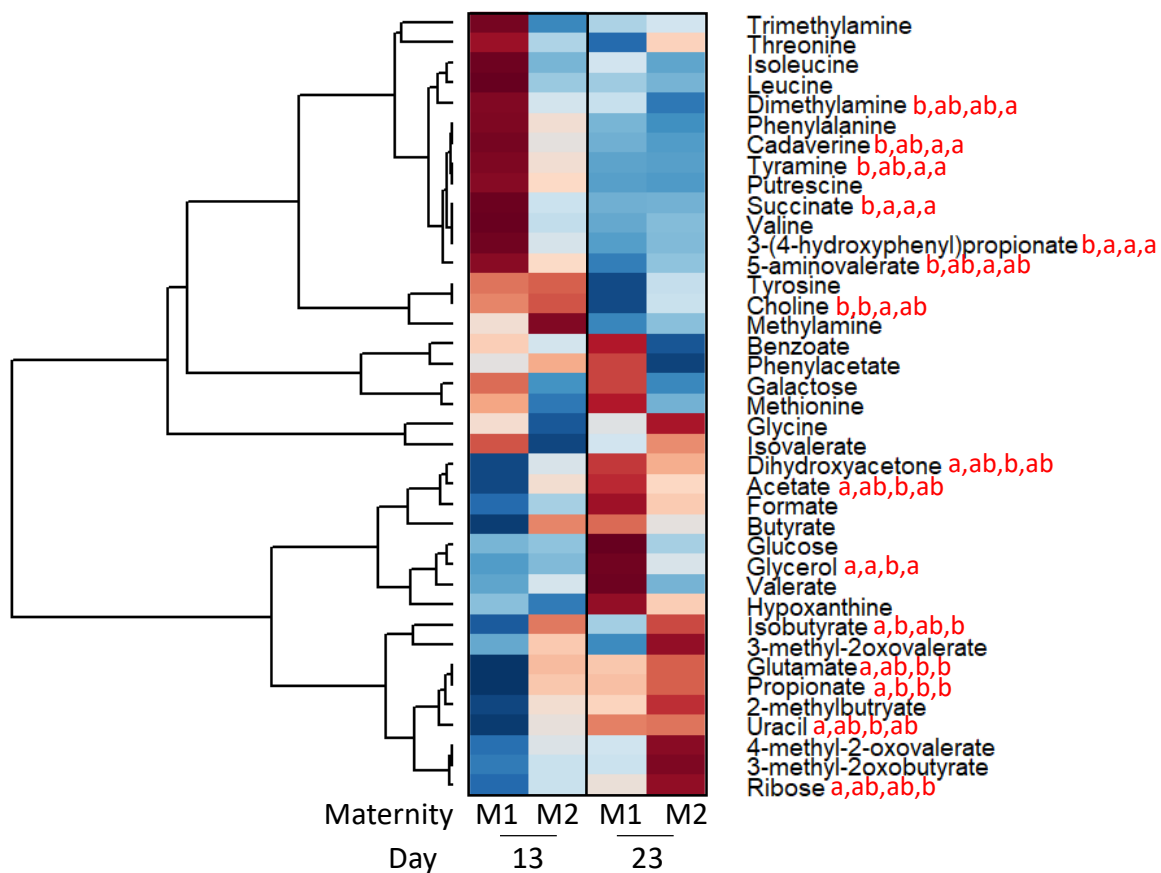

**A**

bioRxiv preprint doi: <https://doi.org/10.1101/2020.04.02.022913>; this version posted April 4, 2020. The copyright holder for this preprint (which was not certified by peer review) is the author/funder, who has granted bioRxiv a license to display the preprint in perpetuity. It is made available under aCC-BY 4.0 International license.

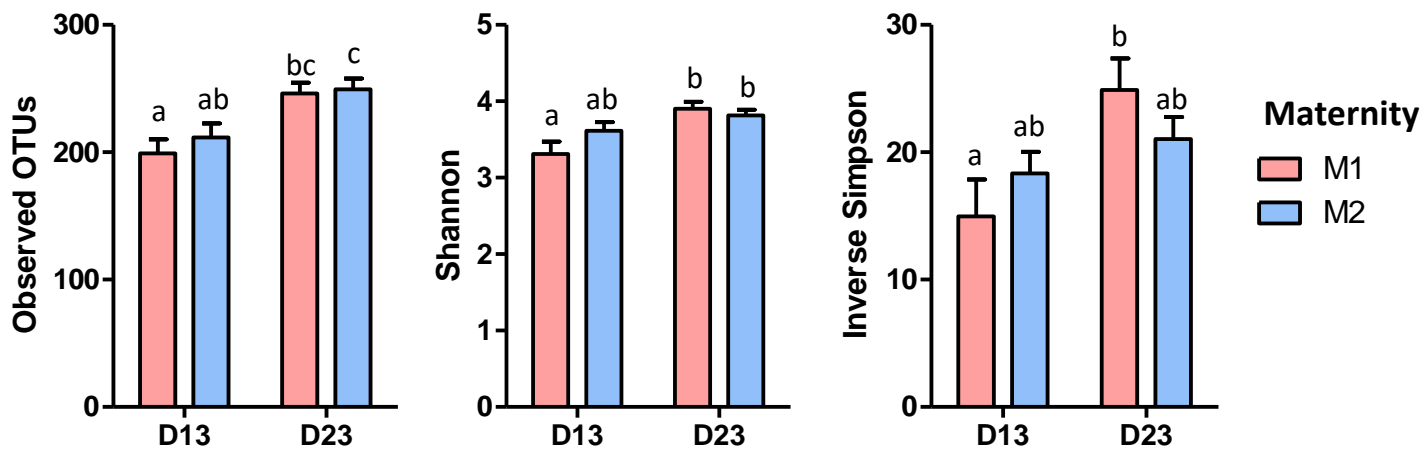**B**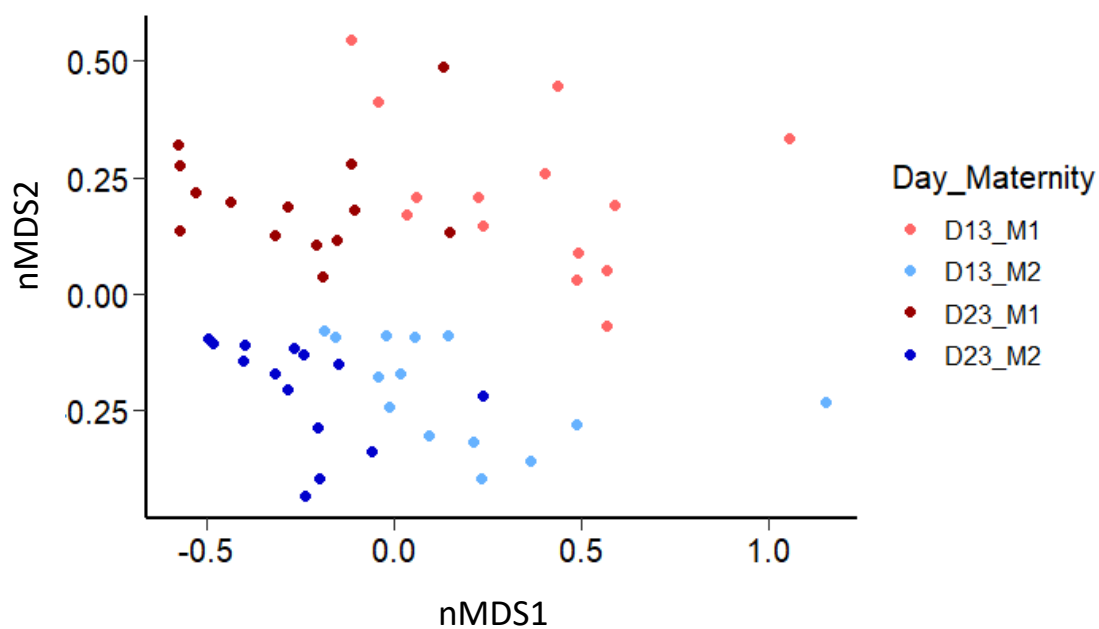

## A Family

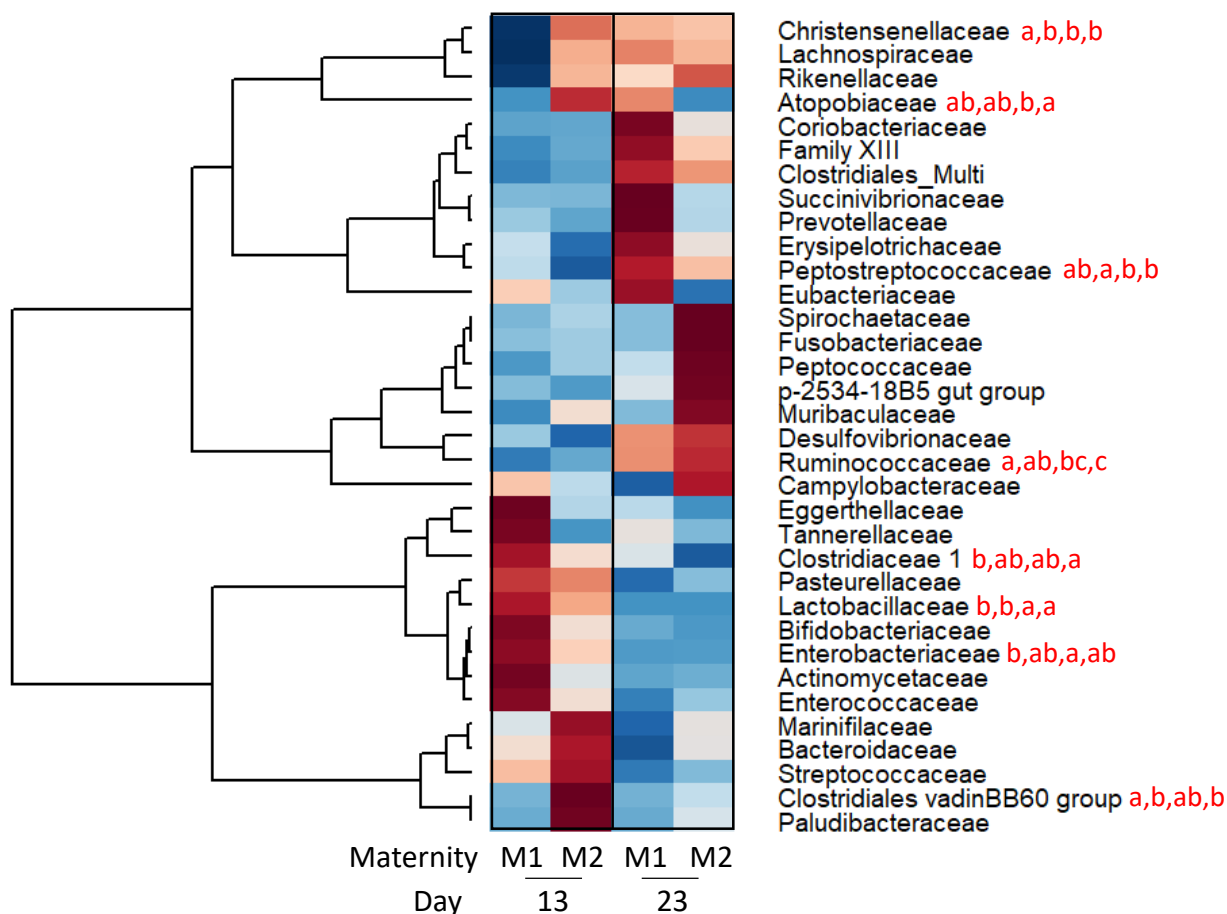

## B Genus

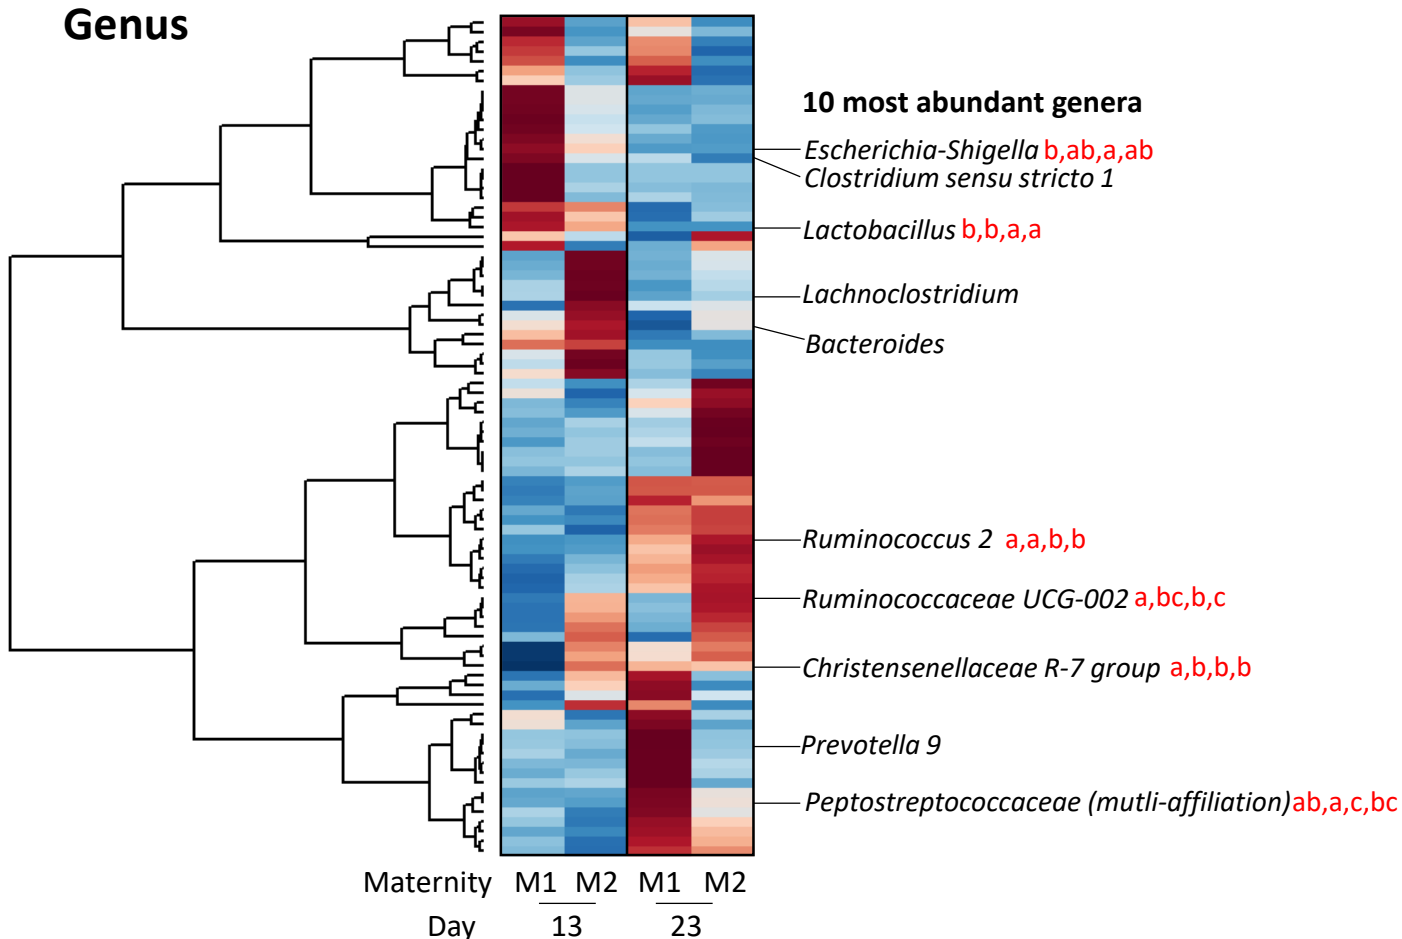

### A Predicted pathways

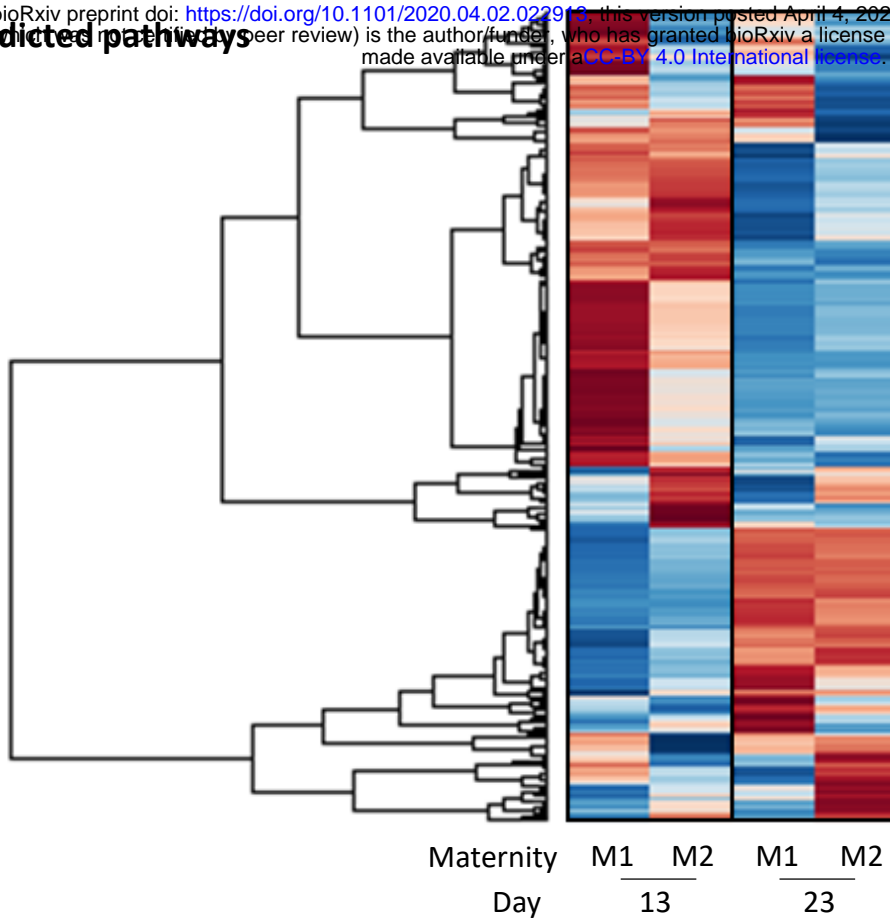

### B Predicted pathway « Fucose degradation »

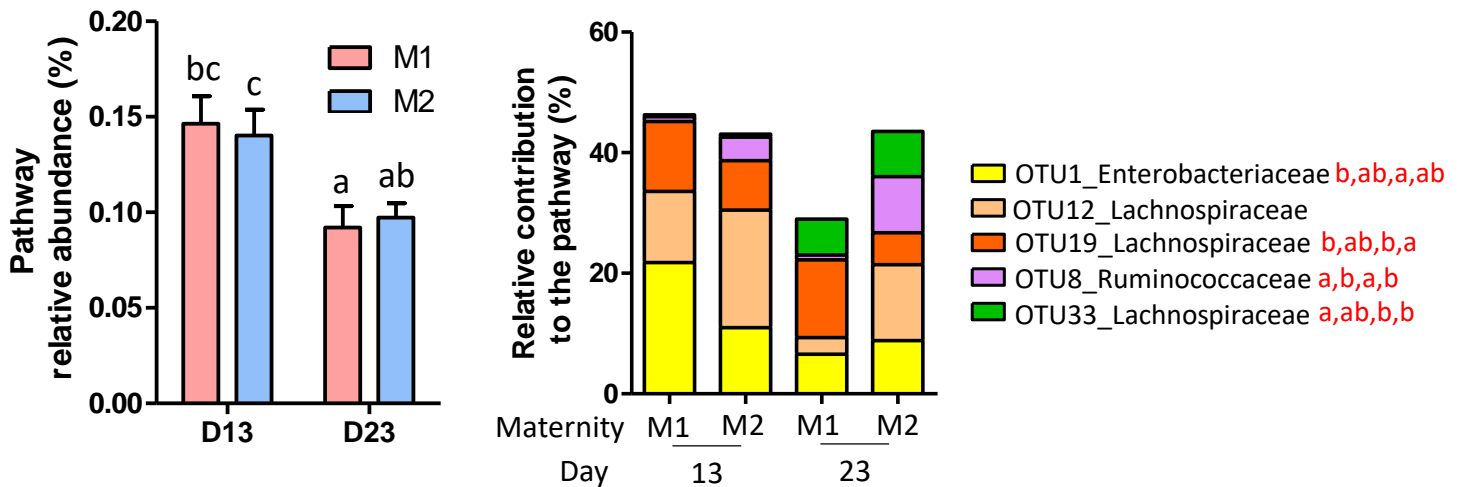

### C Predicted pathway « Starch degradation V »

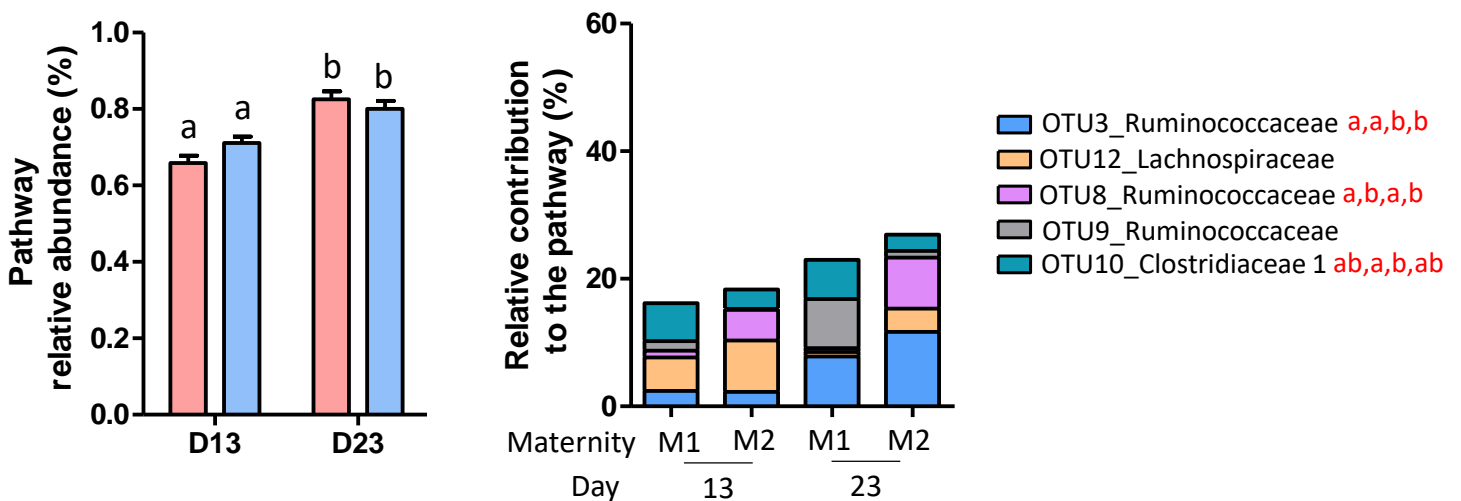

Source: https://www.biorxiv.org/content/10.1101/2020.04.02.022913v1.full.pdf
